# Supplementary material for: A critical role of PRDM14 in human primordial germ cell fate revealed by inducible degrons
Source: PubMed Central journal article supplement (PMC7062732; doi:10.1038/s41467-020-15042-0), 2020-03-09
Supplement: 41467_2020_15042_MOESM4_ESM.pdf [file 41467_2020_15042_MOESM4_ESM.pdf]

## Description of Additional Supplementary Files

### File Name: Supplementary Data 1

**Description:** RNA-seq data for sorted NANOS3-tdTomato<sup>+</sup>AP<sup>+</sup> hPGCLCs and AP<sup>+</sup> hESCs. 2 auxin-sensitive clones (cl11 and cl21), as well as the parental control lacking TIR1 were differentiated with or without IAA for 4 days. For hESCs, the same cell lines were grown for 1 passage (3 days) with or without IAA.

### File Name: Supplementary Data 2

**Description:** Comparative differential expression analysis of PRDM14 depletion in hPGCLCs (from Supplementary Data 1) and *TFAP2C*<sup>-/-</sup> or *PRDM1*<sup>-/-</sup> hPGCLCs (Kojima et al., 2017; Tang et al., 2015). RNA-seq data were re-normalised together to obtain an integrated gene expression table.

### File Name: Supplementary Data 3

**Description:** ChIP-seq data for hPGCLCs and hESCs. 2 PRDM14-AID-Venus clones (cl11 and cl21), as well as the parental control cell line were used. Immunoprecipitation was carried out using the ChIP-grade anti-GFP antibody validated in Supplementary Figure 7A.

### File Name: Supplementary Data 4

**Description:** Comparative differential expression analysis of PRDM14 depletion in hPGCLCs and hESCs (from Supplementary Data 1) and the transcriptome of mouse *Prdm14*<sup>-/-</sup> cells (mPGCLCs and mESCs) from Shirane et al., 2016. RNA-seq data were re-normalised together to obtain an integrated gene expression table.

### File Name: Supplementary Data 5

**Description:** Oligos used in the study.

### File Name: Supplementary Data 6

**Description:** Gene ontology (GO) analysis on hPGCLC RNA-seq from Supplementary Data 1.
